# Supplementary material
Source: MDPI journal article supplement (https://www.mdpi.com/2075-163X/10/3/267)
Supplement: s1 [file s1]

Archive with 2 entries (2 files):
- File 1. Figures S1¿CS28 and Table S1.pdf
- Movie SM1.avi
